# Supplementary material
Source: Research Square preprint supplement (doi:10.21203/rs.3.rs-6038523/v1)
Supplement: Supplementary file 1 [file 1de9fce4580876ef2934c92d.docx]

eAppendix

**Attitudes of physiotherapists towards the use of performance-based measures and questionnaires.**

**Development and validation of the Physiotherapy Assessment Attitude (PAssAt) Scale**

Sven Karstens; Tim Bumb; Jana Koriath; Tobias Braun; Balz Ronald Winteler; Slavko Rogan

Table A0 Lists of typical procedures

| Functional/performance tests | Questionnaires | Classic procedures |
| --- | --- | --- |
| 1. Walking tests (6-minute, 10-meter, …) | 1. Neck Disability Index (NDI) | 1. Numeric Rating Scale (NRS) / Visual Analog Scale (VAS) |
| 1. Timed Up-and-Go-Test (TUG) | 1. Oswestry Disability Index (ODI) | 1. Goniometer (Range of motion) |
| 1. Tinetti-Test / Performance Oriented Mobility Assessment (POMA) | 1. Roland and Morris disability Questionnaire (RMDQ) | 1. Circumference (measuring tape) |
| 1. Berg Balance Scale | 1. Disabilities of the arm, shoulder and hand (DASH/ Quick DASH) |  |
| 1. BESTest / Mini BESTest | 1. Shoulder Pain and Disability Index (SPADI) |  |
| 1. Star Excursion Balance-Test (SEBT) / Y-Balance-Test | 1. Western Ontario and McMaster Universities Osteoarthritis Index (WOMAC) |  |
| 1. Back Performance Scale | 1. STarT-Back-Tool |  |
| 1. Chair Rising-Test | 1. Örebro musculoskeletal pain questionnaire (OMPQ) |  |
| 1. Stair-Climbing-Test | 1. Tampa Scale of Kinesiophobia (TSK) |  |
| 1. De Morton Mobility Index (DEMMI) | 1. Fear Avoidance Beliefs Questionnaire (FABQ) |  |
| 1. Hop-/ Jump tests (single leg/ both legs) |  |  |
| 1. Strength endurance (Biering­Sörensen / McGill) |  |  |

Figure A1 Bar chart on the distribution of responses for the selected items Function/performance tests

B008 usefulness for physiotherapeutic practice, B019_B019 communication patient and therapist, B019_B021 more information about patient, B019_B022 tailoring treatment, B019_B023 patients engaged in treatment planning, B019_B024 cooperation between patient and therapist, B019_B025 documenting progress, B019_B026 impact clinical reasoning, B027_B027 treatment quality

Figure A2 Bar chart on the distribution of responses for the selected items questionnaires

B040 usefulness for physiotherapeutic practice, B052_B052 communication patient and therapist, B052_B053 communication patient and physician, B052_B054 more information about patient, B052_B055 goal setting process, B052_B056 adapt treatment during course of therapy, B052_B057 documenting progress, B052_B058 impact clinical reasoning, B059_B059 argumentation paying bodies, B059_B060 treatment quality

Table A1 Correlation matrix showing item combinations for function/performance tests

|  | B008 | B009_B009 | B009_B010 | B009_B011 | B009_B012 | B009_B013 | B009_B014 | B019_B019 | B019_B020 | B019_B021 | B019_B022 | B019_B023 | B019_B024 | B019_B025 | B019_B026 | B027_B027 | B027_B028 | B027_B029 | B027_B030 | B027_B031 |
| --- | --- | --- | --- | --- | --- | --- | --- | --- | --- | --- | --- | --- | --- | --- | --- | --- | --- | --- | --- | --- |
| B008 | 1 | 0.32 | -0.1 | 0.27 | -0.07 | 0.08 | -0.06 | 0.41 | 0.22 | 0.52 | 0.5 | 0.46 | 0.47 | 0.4 | 0.52 | 0.56 | 0 | 0.26 | 0.26 | 0.23 |
| B009_B009 | 0.32 | 1 | 0.36 | 0.46 | 0 | 0.13 | -0.06 | 0.12 | 0 | 0.21 | 0.31 | 0.24 | 0.25 | 0.29 | 0.32 | 0.25 | -0.1 | 0.15 | 0.3 | 0.28 |
| B009_B010 | -0.1 | 0.36 | 1 | 0.36 | 0.09 | 0.08 | 0.14 | -0.01 | -0.16 | -0.03 | 0.05 | 0 | -0.04 | 0.04 | 0.07 | -0.08 | 0.02 | -0.05 | 0.18 | 0.23 |
| B009_B011 | 0.27 | 0.46 | 0.36 | 1 | -0.07 | 0.15 | -0.08 | 0.12 | -0.13 | 0.22 | 0.22 | 0.19 | 0.2 | 0.19 | 0.35 | 0.19 | 0 | 0.09 | 0.41 | 0.34 |
| B009_B012 | -0.07 | 0 | 0.09 | -0.07 | 1 | 0.26 | 0.36 | 0.05 | 0.14 | 0.06 | -0.02 | 0.15 | 0.1 | 0.04 | 0.11 | -0.04 | -0.12 | -0.12 | -0.09 | -0.1 |
| B009_B013 | 0.08 | 0.13 | 0.08 | 0.15 | 0.26 | 1 | 0.17 | -0.02 | 0 | 0.06 | 0.07 | 0.04 | -0.01 | 0.15 | 0.1 | 0.08 | 0.11 | 0.15 | -0.03 | 0.03 |
| B009_B014 | -0.06 | -0.06 | 0.14 | -0.08 | 0.36 | 0.17 | 1 | -0.04 | -0.03 | -0.05 | -0.08 | -0.06 | -0.07 | 0.01 | -0.05 | -0.11 | 0.11 | -0.12 | -0.01 | 0.03 |
| B019_B019 | 0.41 | 0.12 | -0.01 | 0.12 | 0.05 | -0.02 | -0.04 | 1 | 0.53 | 0.49 | 0.49 | 0.53 | 0.61 | 0.39 | 0.55 | 0.45 | 0.12 | 0.21 | 0.23 | 0.16 |
| B019_B020 | 0.22 | 0 | -0.16 | -0.13 | 0.14 | 0 | -0.03 | 0.53 | 1 | 0.39 | 0.36 | 0.46 | 0.48 | 0.32 | 0.44 | 0.31 | -0.04 | 0.23 | 0.04 | 0.04 |
| B019_B021 | 0.52 | 0.21 | -0.03 | 0.22 | 0.06 | 0.06 | -0.05 | 0.49 | 0.39 | 1 | 0.67 | 0.6 | 0.57 | 0.4 | 0.66 | 0.55 | -0.07 | 0.36 | 0.17 | 0.09 |
| B019_B022 | 0.5 | 0.31 | 0.05 | 0.22 | -0.02 | 0.07 | -0.08 | 0.49 | 0.36 | 0.67 | 1 | 0.61 | 0.56 | 0.54 | 0.64 | 0.53 | 0.01 | 0.31 | 0.16 | 0.12 |
| B019_B023 | 0.46 | 0.24 | 0 | 0.19 | 0.15 | 0.04 | -0.06 | 0.53 | 0.46 | 0.6 | 0.61 | 1 | 0.73 | 0.46 | 0.61 | 0.57 | 0.04 | 0.32 | 0.14 | 0.13 |
| B019_B024 | 0.47 | 0.25 | -0.04 | 0.2 | 0.1 | -0.01 | -0.07 | 0.61 | 0.48 | 0.57 | 0.56 | 0.73 | 1 | 0.37 | 0.56 | 0.49 | 0.02 | 0.33 | 0.14 | 0.05 |
| B019_B025 | 0.4 | 0.29 | 0.04 | 0.19 | 0.04 | 0.15 | 0.01 | 0.39 | 0.32 | 0.4 | 0.54 | 0.46 | 0.37 | 1 | 0.61 | 0.46 | -0.04 | 0.27 | 0.2 | 0.2 |
| B019_B026 | 0.52 | 0.32 | 0.07 | 0.35 | 0.11 | 0.1 | -0.05 | 0.55 | 0.44 | 0.66 | 0.64 | 0.61 | 0.56 | 0.61 | 1 | 0.58 | -0.03 | 0.37 | 0.2 | 0.17 |
| B027_B027 | 0.56 | 0.25 | -0.08 | 0.19 | -0.04 | 0.08 | -0.11 | 0.45 | 0.31 | 0.55 | 0.53 | 0.57 | 0.49 | 0.46 | 0.58 | 1 | 0.07 | 0.4 | 0.19 | 0.12 |
| B027_B028 | 0 | -0.1 | 0.02 | 0 | -0.12 | 0.11 | 0.11 | 0.12 | -0.04 | -0.07 | 0.01 | 0.04 | 0.02 | -0.04 | -0.03 | 0.07 | 1 | 0.17 | -0.23 | -0.28 |
| B027_B029 | 0.26 | 0.15 | -0.05 | 0.09 | -0.12 | 0.15 | -0.12 | 0.21 | 0.23 | 0.36 | 0.31 | 0.32 | 0.33 | 0.27 | 0.37 | 0.4 | 0.17 | 1 | 0.06 | 0.05 |
| B027_B030 | 0.26 | 0.3 | 0.18 | 0.41 | -0.09 | -0.03 | -0.01 | 0.23 | 0.04 | 0.17 | 0.16 | 0.14 | 0.14 | 0.2 | 0.2 | 0.19 | -0.23 | 0.06 | 1 | 0.72 |
| B027_B031 | 0.23 | 0.28 | 0.23 | 0.34 | -0.1 | 0.03 | 0.03 | 0.16 | 0.04 | 0.09 | 0.12 | 0.13 | 0.05 | 0.2 | 0.17 | 0.12 | -0.28 | 0.05 | 0.72 | 1 |

Table A2 Correlation matrix showing item combinations for questionnaires

|  | B040 | B041_B041 | B041_B042 | B041_B043 | B041_B044 | B041_B045 | B041_B046 | B052_B052 | B052_B053 | B052_B054 | B052_B055 | B052_B056 | B052_B057 | B052_B058 | B059_B059 | B059_B060 | B059_B061 | B059_B062 | B059_B063 |
| --- | --- | --- | --- | --- | --- | --- | --- | --- | --- | --- | --- | --- | --- | --- | --- | --- | --- | --- | --- |
| B040 | 1 | 0.13 | -0.22 | 0.18 | 0.16 | -0.07 | 0.08 | 0.48 | 0.36 | 0.52 | 0.54 | 0.51 | 0.54 | 0.64 | 0.58 | 0.72 | -0.11 | 0.19 | 0.17 |
| B041_B041 | 0.13 | 1 | 0.44 | 0.54 | 0.13 | 0.07 | 0.14 | 0.05 | 0.06 | 0.07 | 0.01 | 0.11 | 0.26 | 0.1 | 0.08 | 0.12 | 0.01 | 0.18 | 0.22 |
| B041_B042 | -0.22 | 0.44 | 1 | 0.36 | 0.06 | 0.06 | 0.17 | -0.06 | -0.14 | -0.21 | -0.19 | -0.06 | 0 | -0.17 | -0.17 | -0.2 | 0.16 | 0.2 | 0.24 |
| B041_B043 | 0.18 | 0.54 | 0.36 | 1 | 0.12 | -0.12 | 0.04 | 0.15 | 0.01 | 0.07 | 0.11 | 0.14 | 0.11 | 0.07 | 0.13 | 0.16 | 0.13 | 0.3 | 0.35 |
| B041_B044 | 0.16 | 0.13 | 0.06 | 0.12 | 1 | 0.49 | 0.34 | 0.08 | 0.15 | 0.2 | 0.09 | 0.23 | 0.13 | 0.11 | 0.26 | 0.16 | -0.08 | -0.16 | -0.05 |
| B041_B045 | -0.07 | 0.07 | 0.06 | -0.12 | 0.49 | 1 | 0.51 | -0.06 | 0.13 | 0.04 | -0.02 | 0.08 | -0.02 | -0.1 | -0.03 | -0.1 | 0.01 | -0.33 | -0.22 |
| B041_B046 | 0.08 | 0.14 | 0.17 | 0.04 | 0.34 | 0.51 | 1 | -0.07 | 0.11 | -0.01 | 0 | 0.09 | 0.12 | -0.04 | -0.01 | 0.02 | -0.06 | -0.1 | -0.07 |
| B052_B052 | 0.48 | 0.05 | -0.06 | 0.15 | 0.08 | -0.06 | -0.07 | 1 | 0.59 | 0.57 | 0.65 | 0.58 | 0.35 | 0.53 | 0.48 | 0.55 | -0.03 | 0.14 | 0.2 |
| B052_B053 | 0.36 | 0.06 | -0.14 | 0.01 | 0.15 | 0.13 | 0.11 | 0.59 | 1 | 0.44 | 0.52 | 0.52 | 0.32 | 0.45 | 0.64 | 0.47 | -0.12 | -0.04 | 0.06 |
| B052_B054 | 0.52 | 0.07 | -0.21 | 0.07 | 0.2 | 0.04 | -0.01 | 0.57 | 0.44 | 1 | 0.67 | 0.59 | 0.37 | 0.62 | 0.48 | 0.63 | -0.04 | 0.03 | 0.06 |
| B052_B055 | 0.54 | 0.01 | -0.19 | 0.11 | 0.09 | -0.02 | 0 | 0.65 | 0.52 | 0.67 | 1 | 0.62 | 0.38 | 0.66 | 0.52 | 0.64 | 0.02 | 0.09 | 0.06 |
| B052_B056 | 0.51 | 0.11 | -0.06 | 0.14 | 0.23 | 0.08 | 0.09 | 0.58 | 0.52 | 0.59 | 0.62 | 1 | 0.49 | 0.63 | 0.52 | 0.62 | -0.15 | 0.05 | 0.08 |
| B052_B057 | 0.54 | 0.26 | 0 | 0.11 | 0.13 | -0.02 | 0.12 | 0.35 | 0.32 | 0.37 | 0.38 | 0.49 | 1 | 0.49 | 0.43 | 0.5 | 0 | 0.06 | 0.11 |
| B052_B058 | 0.64 | 0.1 | -0.17 | 0.07 | 0.11 | -0.1 | -0.04 | 0.53 | 0.45 | 0.62 | 0.66 | 0.63 | 0.49 | 1 | 0.6 | 0.75 | -0.12 | 0.13 | 0.09 |
| B059_B059 | 0.58 | 0.08 | -0.17 | 0.13 | 0.26 | -0.03 | -0.01 | 0.48 | 0.64 | 0.48 | 0.52 | 0.52 | 0.43 | 0.6 | 1 | 0.64 | -0.23 | 0.09 | 0.13 |
| B059_B060 | 0.72 | 0.12 | -0.2 | 0.16 | 0.16 | -0.1 | 0.02 | 0.55 | 0.47 | 0.63 | 0.64 | 0.62 | 0.5 | 0.75 | 0.64 | 1 | -0.2 | 0.14 | 0.09 |
| B059_B061 | -0.11 | 0.01 | 0.16 | 0.13 | -0.08 | 0.01 | -0.06 | -0.03 | -0.12 | -0.04 | 0.02 | -0.15 | 0 | -0.12 | -0.23 | -0.2 | 1 | 0.27 | 0.29 |
| B059_B062 | 0.19 | 0.18 | 0.2 | 0.3 | -0.16 | -0.33 | -0.1 | 0.14 | -0.04 | 0.03 | 0.09 | 0.05 | 0.06 | 0.13 | 0.09 | 0.14 | 0.27 | 1 | 0.77 |
| B059_B063 | 0.17 | 0.22 | 0.24 | 0.35 | -0.05 | -0.22 | -0.07 | 0.2 | 0.06 | 0.06 | 0.06 | 0.08 | 0.11 | 0.09 | 0.13 | 0.09 | 0.29 | 0.77 | 1 |

Figure A3 Scree Plot (Factors)
